# Supplementary material for: Na3MnTi(PO4)3/C Nanofiber Free-Standing Electrode for Long-Cycling-Life Sodium-Ion Batteries
Source: MDPI journal article supplement (doi:10.3390/nano14090804), 2024-05-05
Supplement: s1 [file s1]

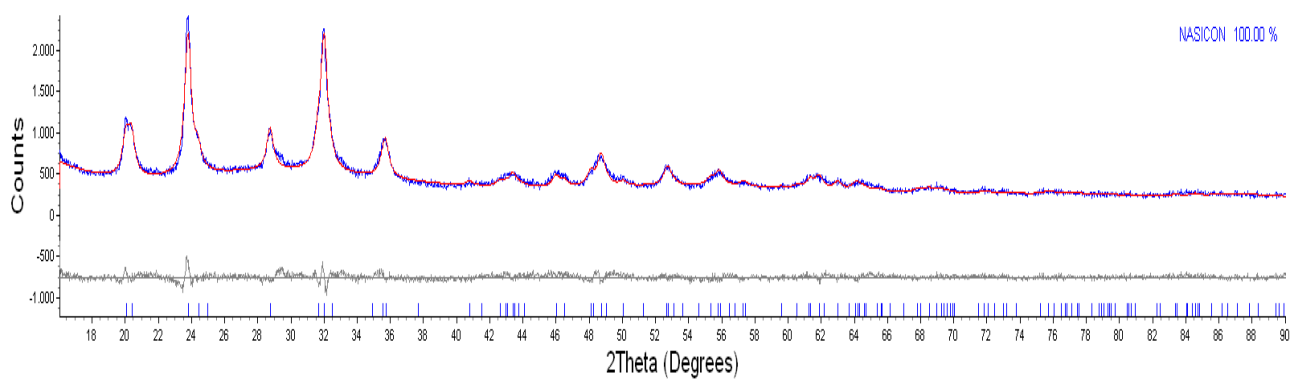

(a)

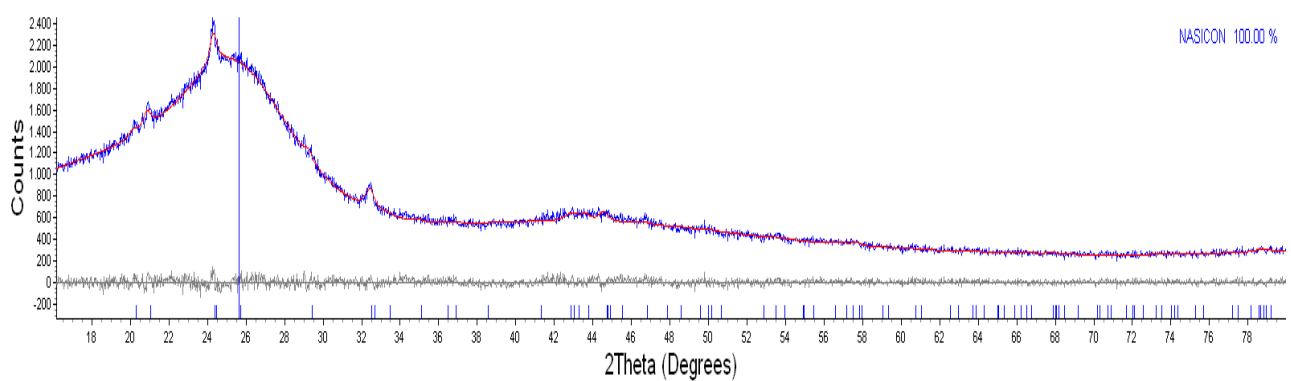

(b)

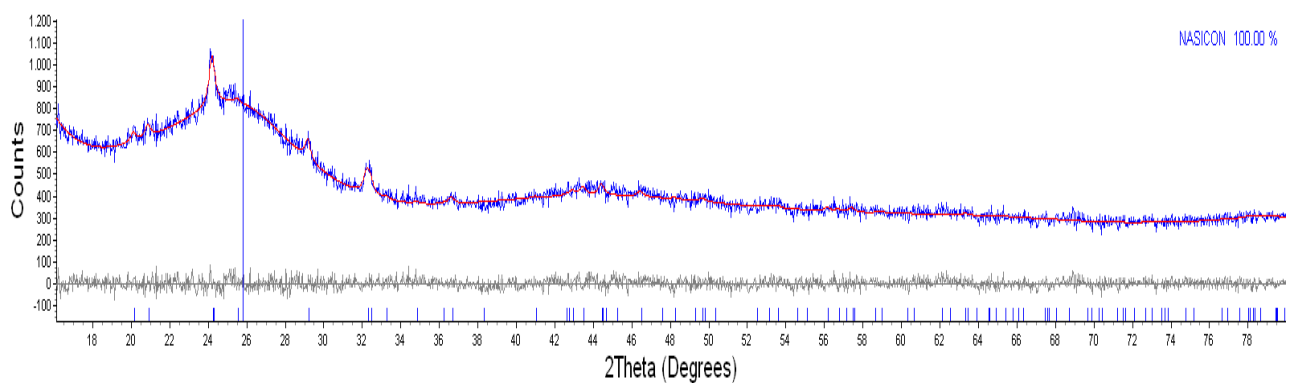

(c)

Figure S1. Rietveld refinement of the X-ray diffraction data of the (a) MnTi, (b) 10%MnTi/CNF and (c) 30%MnTi/CNF samples. Experimental pattern (blue line), calculated pattern (red line), difference curve (grey line). Peaks position of the  $\text{Na}_3\text{MnTi}(\text{PO}_4)_3$  phase (blue bars).

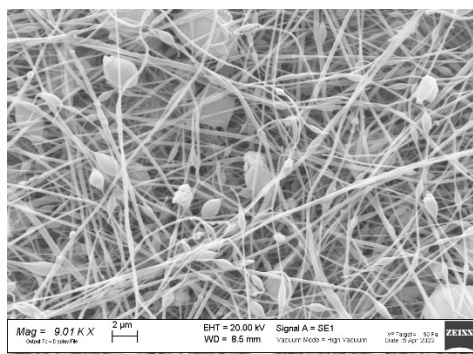

(a)

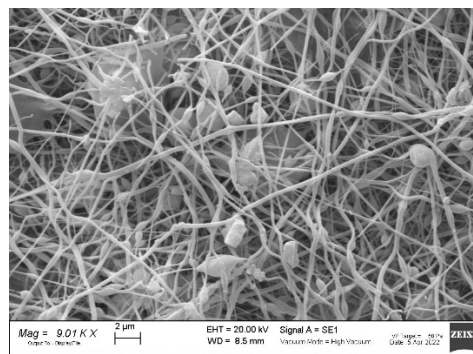

(b)

Figure S2. SEM images of (a) electrospun and (b) carbonized 10%MnTi/CNF sample.

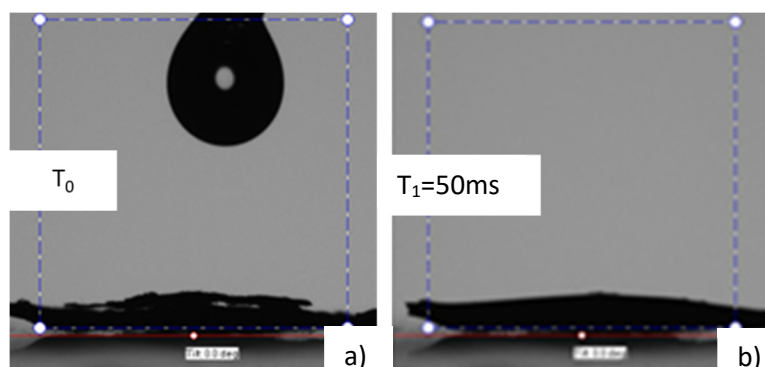

Figure S3. The electrolyte permeation in 10%MnTi/CNF after carbonization.

As shown in Figure S3, the electrolyte permeation is complete and fast in 10%MnTi/CNF carbonized sample. After 50 ms the electrolyte is completely absorbed by the 3D CNFs network. The impregnation of the self-standing electrode is demonstrated, because the electrode swells. The contact angle cannot be evaluated due to the fast electrolyte adsorption.

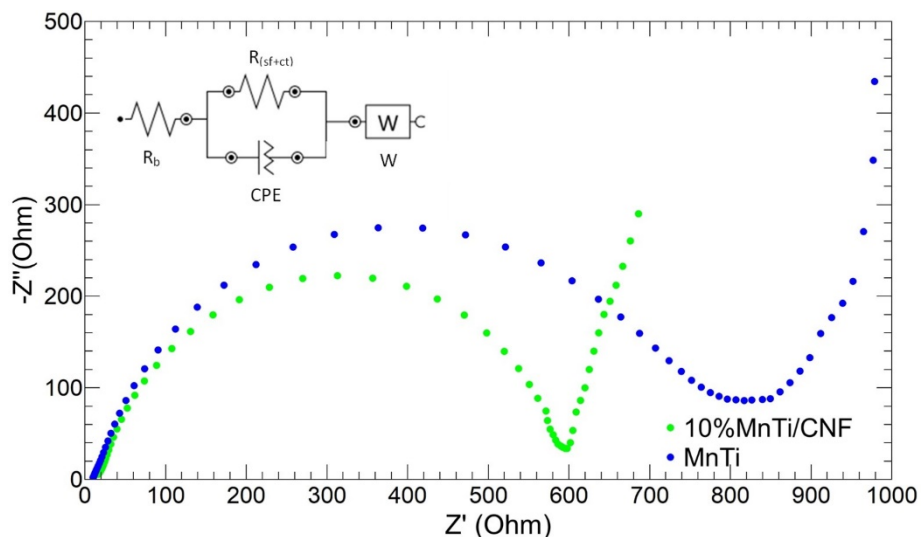

Figure S4. Nyquist plot of the 10%MnTi/CNF and MnTi electrodes. The equivalent circuit is shown in the inset.  $R_b$ : electrolyte resistance;  $R_{(sf+ct)}$ : surface and charge transfer resistance; W: Warburg impedance.

Table S1.  $\text{Na}_3\text{MnTi}(\text{PO}_4)_3$  lattice parameters, crystallite size, degree of crystallinity, discrepancy factor and goodness of fit obtained by the Rietveld refinement of the MnTi and MnTi/CNF samples. Cell volume and  $c/a$  ratio is also reported.

| SAMPLE                | MnTi      | 10%MnTi/CNF* | 30%MnTi/CNF* |
|-----------------------|-----------|--------------|--------------|
| $a$ (Å)               | 8.696(2)  | 8.441(6)     | 8.462(8)     |
| $c$ (Å)               | 21.851(5) | 21.834(19)   | 21.911(29)   |
| $V$ (Å <sup>3</sup> ) | 1431.00   | 1347.26      | 1358.75      |
| $c/a$                 | 2.51      | 2.59         | 2.59         |
| Crystallite size (nm) | 18.7(3)   | 19.0(1.4)    | 25.2(2.3)    |
| Crystallinity (%)     | -         | 9.25         | 8.1          |
| $R_{wp}$              | 6.26      | 4.20         | 5.13         |
| S                     | 1.34      | 1.10         | 1.07         |

\* Refined parameters:

- (i) global parameters: polynomial background (order 2) and sample displacement;
- (ii)  $\text{Na}_3\text{MnTi}(\text{PO}_4)_3$  phase: scale factor, crystallite size (Profile model: Fundamental Parameters approach), lattice parameters;
- (iii) amorphous broad band:  $2\theta$  position, intensity, and peak broadening.
